# Supplementary material for: Acute Ketogenic Diet and Ketone Ester Supplementation Impairs Race Walk Performance
Source: PubMed Central journal article supplement — Med Sci Sports Exerc. 2020 Oct 5;53(4):776–84. doi: 10.1249/MSS.0000000000002517 (PMC7969177; doi:10.1249/mss.0000000000002517), 2020-10-05
Supplement: mss-53-776-s003.pdf [file mss-53-776-s003.pdf]

Table SDC 1. Characteristics of elite race walkers

|                                                                       | High CHO Availability (HCHO) | Low CHO, High Fat (LCHF) |
|-----------------------------------------------------------------------|------------------------------|--------------------------|
| Sample Size                                                           | 9                            | 9                        |
| Age (years)                                                           | 25.9 ± 7.0                   | 26.2 ± 6.7               |
| BM (kg)                                                               | 64.6 ± 7.4                   | 63.1 ± 7.4               |
| Baseline $\dot{V}O_{2peak}$ (mL·kg <sup>-1</sup> ·min <sup>-1</sup> ) | 61 ± 6                       | 64 ± 7                   |
| Personal Best in 10km race walk (min:ss.ms)                           | 42:38.96 ± 3:49.21           | 41:35.73 ± 2:10.03       |
| Personal Best in 20km race walk (h:min:ss)                            | 1:23:40 ± 2:09               | 1:21:55 ± 2:50           |
| Phase 1 (Baseline) Training Volume (km)                               | 71.7 ± 27.7                  | 67.6 ± 24.3              |
| Phase 2 Training Volume (km)                                          | 100.1 ± 21.8**               | 107.6 ± 21.3**           |
| Phase 3 (Adaptation) Training Volume (km)                             | 115.8 ± 29.9***              | 102.6 ± 41.2**           |

Data are mean ± SD. Significant differences within group relative to Baseline denoted by \*\*( $p < 0.005$ ), \*\*\*( $p < 0.0001$ ).
