# Supplementary material for: Acute Ketogenic Diet and Ketone Ester Supplementation Impairs Race Walk Performance
Source: PubMed Central journal article supplement — Med Sci Sports Exerc. 2020 Oct 5;53(4):776–84. doi: 10.1249/MSS.0000000000002517 (PMC7969177; doi:10.1249/mss.0000000000002517), 2020-10-05
Supplement: mss-53-776-s004.pdf [file mss-53-776-s004.pdf]

Table SDC 3. Actual dietary intake during baseline testing and following adaptation to a dietary intervention undertaken by elite race walkers

|                                        | High CHO Availability<br>(n=9) | Low CHO, High Fat<br>(n=9) |
|----------------------------------------|--------------------------------|----------------------------|
| Baseline Period                        |                                |                            |
| Energy intake (kJ·d <sup>-1</sup> )    | 14916 ± 1573                   | 15194 ± 1494               |
| Energy intake (kJ·kg·d <sup>-1</sup> ) | 231.3 ± 13.9                   | 234.0 ± 14.3               |
| CHO (g·d <sup>-1</sup> )               | 538 ± 58                       | 537 ± 60                   |
| CHO (g·kg·d <sup>-1</sup> )            | 8.5 ± 0.7                      | 8.5 ± 0.5                  |
| CHO (E%)                               | 62.1 ± 1.0                     | 61.9 ± 0.7                 |
| Protein (g·d <sup>-1</sup> )           | 133 ± 15                       | 132 ± 16                   |
| Protein (g·kg·d <sup>-1</sup> )        | 2.0 ± 0.0                      | 2.1 ± 0.1                  |
| Protein (E%)                           | 15.3 ± 0.2                     | 15.3 ± 0.3                 |
| Fat (g·d <sup>-1</sup> )               | 83 ± 10                        | 84 ± 8                     |
| Fat (g·kg·d <sup>-1</sup> )            | 1.3 ± 0.0                      | 1.3 ± 0.0                  |
| Fat (E%)                               | 20.5 ± 0.9                     | 20.8 ± 0.4                 |
| Adaptation Period                      |                                |                            |
| Energy intake (kJ·d <sup>-1</sup> )    | 14690 ± 1497                   | 14375 ± 1420               |
| Energy intake (kJ·kg·d <sup>-1</sup> ) | 227.7 ± 11.0                   | 221.4 ± 15.4**             |
| CHO (g·d <sup>-1</sup> )               | 533 ± 51###                    | 38 ± 4***                  |
| CHO (g·kg·d <sup>-1</sup> )            | 8.3 ± 0.5###                   | 0.6 ± 0.1***               |
| CHO (E%)                               | 61.7 ± 0.8###                  | 4.5 ± 0.2***               |
| Protein (g·d <sup>-1</sup> )           | 133 ± 15                       | 135 ± 15                   |
| Protein (g·kg·d <sup>-1</sup> )        | 2.1 ± 0.1                      | 2.1 ± 0.1                  |
| Protein (E%)                           | 15.4 ± 0.3**,##                | 16.0 ± 0.2                 |
| Fat (g·d <sup>-1</sup> )               | 83 ± 10###                     | 296 ± 29***                |
| Fat (g·kg·d <sup>-1</sup> )            | 1.3 ± 0.0###                   | 4.7 ± 0.3***               |
| Fat (E%)                               | 20.8 ± 0.5###                  | 76.2 ± 0.4***              |

Data are mean ± SD. Baseline period = HCHO intake in all groups. Significant differences within group between Baseline and Adaptation denoted by \*\*( $p < 0.005$ ), \*\*\*( $p < 0.0001$ ). Significant differences between HCHO and LCHF denoted by ##( $p < 0.005$ ), ###( $p < 0.0001$ ).
